# Supplementary material
Source: HighWire-hosted journal article supplement (https://drc.bmj.com/content/12/1/e003744)
Supplement: inline-supplementary-material-1 [file inline-supplementary-material-1.pdf]

Supplementary Table 1. Characteristics of the study participants

|                                    |                     |                     |
|------------------------------------|---------------------|---------------------|
| Female : Male                      | 44 : 106            |                     |
| Age (years old)                    | 69.0 (64.0–72.0)    |                     |
| Duration of diabetes (years)       | 14.0 (8.0–24.0)     |                     |
| BMI (kg/m <sup>2</sup> )           | 24.0 (22.3–26.0)    |                     |
| HbA1c (%)                          | 7.0 (6.6–7.6)       |                     |
| GA (%)                             | 18.3 (16.3–20.4)    |                     |
| GA/HbA1c                           | 2.6 (2.4–2.8)       |                     |
| SBP (mmHg)                         | 127.0 (116.0–137.0) |                     |
| DBP (mmHg)                         | 75.0 (69.0–81.8)    |                     |
| Non-HDL cholesterol (mg/dL)        | 122.0 (100.3–146.0) |                     |
| HDL cholesterol (mg/dL)            | 55.0 (46.3–66.0)    |                     |
| eGFR (mL/min/1.73 m <sup>2</sup> ) | 71.5 (59.0–82.0)    |                     |
| UACR (mg/gCr)                      | 15.1 (6.9–47.9)     |                     |
| History of IHD (%)                 | 13.3                |                     |
| History of CVD (%)                 | 10.7                |                     |
| Current smoker (%)                 | 21.3                |                     |
| Dyslipidemia (%)                   | 80.0                |                     |
| Hypertension (%)                   | 66.0                |                     |
| MMSE                               | 30.0 (29.0–30.0)    |                     |
| Presence of severe DSWML (%)       | 32.7                |                     |
| Presence of severe PWML (%)        | 15.3                |                     |
| Presence of MTA (%)                | 13.3                |                     |
| Z-scores in the target VOI         | 0.58 (0.43–0.83)    |                     |
| Diabetes treatment                 |                     |                     |
| Metformin (%)                      | 47.3                |                     |
| SU/glinides (%)                    | 24.7                |                     |
| Thiazolidines (%)                  | 7.3                 |                     |
| DPP-4 inhibitors (%)               | 46.7                |                     |
| SGLT2 inhibitors (%)               | 24.0                |                     |
| α- glucosidase inhibitors (%)      | 10.7                |                     |
| Insulin (%)                        | 27.3                |                     |
| GLP-1 receptor agonists (%)        | 14.0                |                     |
| CGM metrics                        | All sensor data     | day 3–day 12        |
| Mean SG (mg/dL)                    | 141.9 (125.1–165.8) | 141.0 (124.2–165.7) |

|                            |                  |                  |
|----------------------------|------------------|------------------|
| CV (%)                     | 28.0 (24.6–31.7) | 28.3 (24.5–31.5) |
| TIR (%)                    | 77.9 (65.3–88.1) | 77.0 (65.9–87.5) |
| TAR <sup>&gt;250</sup> (%) | 1.1 (0–6.7)      | 1.3 (0–6.7)      |
| TAR <sup>&gt;180</sup> (%) | 18.1 (8.4–34.0)  | 17.8 (7.7–32.1)  |
| TBR <sup>&lt;70</sup> (%)  | 0.2 (0–2.1)      | 0.1 (0–2.3)      |
| TBR <sup>&lt;54</sup> (%)  | 0 (0–0)          | 0 (0–0.1)        |
| GRI (%)                    | 22.1 (12.6–40.9) | 22.9 (12.7–43.8) |
| HyperCompo (%)             | 9.5 (4.2–20.2)   | 9.2 (4.0–18.3)   |
| HypoCompo (%)              | 0.2 (0–1.8)      | 0.1 (0–1.9)      |
| HBGI                       | 3.8 (2.5–5.9)    | 3.7 (2.3–6.1)    |
| LBGI                       | 0.7 (0.3–1.6)    | 0.8 (0.3–1.9)    |

The results are the median values (interquartile range) or percentages.

Abbreviations: BMI, body mass index; CV, coefficient of variation; CVD, cerebrovascular disease; DBP, diastolic blood pressure; DSWML, deep subcortical white matter lesions; DPP-4, dipeptidyl peptidase-4; eGFR, estimated glomerular filtration rate; GA, glycated albumin; GLP-1, glucagon-like peptide-1; GRI, glycemia risk index; HBGI, high blood glucose index; HDL, high-density lipoprotein; HyperCompo, hyperglycemia component of GRI; HypoCompo, hypoglycemia component of GRI; IHD, ischemic heart disease; LBGI, low blood glucose index; MMSE, mini-mental state examination; MTA, medial temporal lobe atrophy; PWML, periventricular white matter lesion; SBP, systolic blood pressure; SG, sensor glucose; SGLT2, sodium-glucose transporter 2; SU, sulfonylurea; TAR, time above range; TBR, time below range; TIR, time in range; VOI, volume of interest.

Supplementary Table 2. Differences in continuous glucose monitoring (CGM) metrics according to the presence or absence of severe cerebral white matter lesions and medial temporal atrophy

|                                    | Without severe WMLs<br>(N = 101) | With severe WMLs<br>(N = 49) | <i>P</i> | Without MTA<br>(N = 130) | With MTA<br>(N = 20) | <i>P</i> |
|------------------------------------|----------------------------------|------------------------------|----------|--------------------------|----------------------|----------|
| CGM metrics (all data)             |                                  |                              |          |                          |                      |          |
| Mean SG (mg/dL)                    | 141.2 (126.6–159.8)              | 144.2 (123.2–192.4)          | 0.256    | 141.9 (124.5–165.6)      | 141.9 (133.6–165.9)  | 0.648    |
| CV (%)                             | 28.2 (24.4–31.2)                 | 27.5 (24.7–32.5)             | 0.829    | 28.2 (24.6–31.7)         | 27.0 (24.5–31.2)     | 0.836    |
| TIR of <50% (%)                    | 8.9                              | 26.5                         | 0.006    | 14.6                     | 15.0                 | 1.000    |
| TAR <sup>&gt;250</sup> (%)         | 1.0 (0–4.0)                      | 1.7 (0.1–10.9)               | 0.110    | 1.5 (0.1–5.5)            | 0.6 (0–9.2)          | 0.858    |
| TAR <sup>&gt;250</sup> of >10% (%) | 8.9                              | 28.6                         | 0.003    | 13.8                     | 25.0                 | 0.195    |
| TAR <sup>&gt;180</sup> (%)         | 17.5 (8.5–29.7)                  | 20.2 (8.1–54.3)              | 0.203    | 18.2 (8.1–34.0)          | 16.6 (8.4–32.0)      | 0.980    |
| TAR <sup>&gt;180</sup> of >50% (%) | 8.9                              | 26.5                         | 0.006    | 14.6                     | 15.0                 | 1.000    |
| TBR <sup>&lt;70</sup> (%)          | 0.2 (0.0–1.9)                    | 0 (0–2.5)                    | 0.978    | 0.2 (0.0–2.3)            | 0.1 (0.0–1.4)        | 0.670    |
| TBR <sup>&lt;70</sup> of <4% (%)   | 11.9                             | 20.4                         | 0.255    | 15.4                     | 10.0                 | 0.739    |
| TBR <sup>&lt;54</sup> (%)          | 0 (0–0)                          | 0 (0–0)                      | 0.843    | 0 (0–0)                  | 0 (0–0)              | 0.985    |
| TBR <sup>&lt;54</sup> of >1%       | 9.9                              | 14.3                         | 0.424    | 11.5                     | 10.0                 | 1.000    |
| GRI (%)                            | 20.9 (12.5–32.7)                 | 35.2 (13.1–61.1)             | 0.013    | 21.9 (12.9–40.8)         | 24.1 (8.8–44.2)      | 0.941    |
| HyperCompo (%)                     | 9.3 (4.3–16.3)                   | 13.4 (4.2–31.9)              | 0.169    | 9.7 (4.3–20.2)           | 8.6 (4.2–18.7)       | 0.936    |
| HypoCompo (%)                      | 0.2 (0–1.5)                      | 0 (0–2.0)                    | 0.978    | 0.2 (0–1.9)              | 0 (0–1.1)            | 0.657    |
| HBGI                               | 3.6 (2.5–5.0)                    | 4.3 (2.4–9.5)                | 0.127    | 3.8 (2.5–5.8)            | 3.6 (2.2–6.3)        | 0.921    |
| LBGI                               | 0.8 (0.4–1.5)                    | 0.6 (0.3–1.7)                | 0.765    | 0.8 (0.3–1.7)            | 0.5 (0.3–1.2)        | 0.280    |

## CGM metrics (data from day 3 to day 12)

|                                    |                     |                     |       |                     |                     |       |
|------------------------------------|---------------------|---------------------|-------|---------------------|---------------------|-------|
| Mean SG (mg/dL)                    | 138.1 (124.9–159.3) | 145.0 (122.6–190.7) | 0.283 | 141.0 (123.4–166.2) | 141.7 (130.4–162.5) | 0.676 |
| CV (%)                             | 28.5 (24.5–31.4)    | 27.9 (24.5–31.9)    | 0.908 | 28.5 (24.6–31.5)    | 27.3 (24.3–32.6)    | 0.870 |
| TIR (%)                            | 78.6 (69.7–88.0)    | 71.3 (48.5–87.4)    | 0.052 | 77.6 (65.2–87.4)    | 72.9 (66.9–90.9)    | 0.776 |
| TIR of <50% (%)                    | 8.9                 | 26.5                | 0.006 | 14.6                | 15.0                | 1.000 |
| TAR <sup>&gt;250</sup> (%)         | 1.3 (0–3.7)         | 1.3 (0–11.9)        | 0.192 | 1.3 (0–5.5)         | 0.6 (0–10.0)        | 0.931 |
| TAR <sup>&gt;250</sup> of >10% (%) | 7.9                 | 28.6                | 0.002 | 13.8                | 20.0                | 0.498 |
| TAR <sup>&gt;180</sup> (%)         | 17.1 (7.6–28.9)     | 20.4 (7.7–51.5)     | 0.241 | 18.3 (7.7–32.8)     | 17.1 (7.7–29.8)     | 0.892 |
| TAR <sup>&gt;180</sup> of >50% (%) | 8.9                 | 26.5                | 0.006 | 14.6                | 15.0                | 1.000 |
| TBR <sup>&lt;70</sup> (%)          | 0.1 (0–2.2)         | 0.1 (0–2.5)         | 0.892 | 0.1 (0–2.4)         | 0.1 (0–1.3)         | 0.755 |
| TBR <sup>&lt;70</sup> of <4% (%)   | 14.9                | 24.5                | 0.225 | 17.7                | 20.0                | 0.505 |
| TBR <sup>&lt;54</sup> (%)          | 0 (0–0.1)           | 0 (0–0.1)           | 0.940 | 0 (0–0.1)           | 0 (0–0)             | 0.747 |
| TBR <sup>&lt;54</sup> of >1%       | 11.9                | 16.3                | 0.621 | 13.8                | 10.0                | 0.480 |
| GRI (%)                            | 21.6 (12.5–33.3)    | 33.3 (13.9–56.9)    | 0.031 | 22.4 (13.0–43.8)    | 25.1 (11.6–44.7)    | 0.965 |
| HyperCompo (%)                     | 9.1 (4.1–16.1)      | 12.3 (3.9–29.8)     | 0.232 | 9.3 (4.1–18.3)      | 8.8 (3.9–18.6)      | 0.834 |
| HypoCompo (%)                      | 0.1 (0–1.8)         | 0.1 (0–2.1)         | 0.890 | 0.1 (0–2.0)         | 0.1 (0–1.0)         | 0.751 |
| HBGI                               | 3.5 (2.3–5.2)       | 4.0 (2.4–9.5)       | 0.181 | 3.8 (2.4–6.1)       | 3.5 (2.2–6.1)       | 0.989 |
| LBGI                               | 0.9 (0.4–1.9)       | 0.8 (0.2–2.0)       | 0.703 | 0.8 (0.3–1.9)       | 0.6 (0.3–1.5)       | 0.291 |

The results are the median values (interquartile range) or percentages. The Mann–Whitney U test was used to compare continuous variables, and the chi-square test or Fisher’s exact test was used to compare categorical data.

Abbreviations: CV, coefficient of variation; GRI, glycemia risk index; HBGI, high blood glucose index; HyperCompo, hyperglycemia component; HypoCompo, hyperglycemia component; LBGI, low blood glucose index; MTA, medial temporal lobe atrophy; SG, sensor glucose; TAR, time

above range; TBR, time below range; TIR, time in range.

Supplementary Table 3. Association between the severity of cerebral white matter lesions and continuous glucose monitoring (CGM) derived glycemic control indices for 10 days

|                                       | Severe white matter lesions |       |                                       |                     |       |
|---------------------------------------|-----------------------------|-------|---------------------------------------|---------------------|-------|
|                                       | OR (95% CI)                 | P     | OR (95% CI)                           | P                   |       |
| Mean SG (day 3–day 12)                |                             |       | CV (day 3–day 12)                     |                     |       |
| Univariate                            | 1.010 (0.999–1.020)         | 0.066 | Univariate                            | 1.018 (0.963–1.076) | 0.525 |
| Model 1                               | 1.009 (0.998–1.019)         | 0.097 | Model 1                               | 1.019 (0.963–1.078) | 0.507 |
| Model 2                               | 1.011 (1.000–1.022)         | 0.047 | Model 2                               | 1.012 (0.955–1.073) | 0.684 |
| Model 3                               | 1.011 (1.000–1.022)         | 0.051 | Model 3                               | 1.008 (0.949–1.070) | 0.807 |
| TIR (day 3–day 12)                    |                             |       | TAR <sup>&gt;250</sup> (day 3–day 12) |                     |       |
| Univariate                            | 0.977 (0.960–0.995)         | 0.011 | Univariate                            | 1.060 (1.017–1.105) | 0.006 |
| Model 1                               | 0.978 (0.960–0.995)         | 0.013 | Model 1                               | 1.057 (1.013–1.102) | 0.010 |
| Model 2                               | 0.974 (0.956–0.993)         | 0.007 | Model 2                               | 1.066 (1.021–1.113) | 0.004 |
| Model 3                               | 0.974 (0.956–0.993)         | 0.006 | Model 3                               | 1.063 (1.018–1.110) | 0.006 |
| TAR <sup>&gt;180</sup> (day 3–day 12) |                             |       | TBR <sup>&lt;70</sup> (day 3–day 12)  |                     |       |
| Univariate                            | 1.023 (1.008–1.038)         | 0.003 | Univariate                            | 1.030 (0.980–1.082) | 0.244 |
| Model 1                               | 1.026 (1.011–1.042)         | 0.001 | Model 1                               | 1.036 (0.984–1.091) | 0.173 |
| Model 2                               | 1.020 (1.002–1.038)         | 0.027 | Model 2                               | 1.031 (0.976–1.090) | 0.275 |
| Model 3                               | 1.020 (1.002–1.038)         | 0.028 | Model 3                               | 1.032 (0.972–1.095) | 0.298 |
| TBR <sup>&lt;54</sup> (day 3–day 12)  |                             |       | GRI (day 3–day 12)                    |                     |       |
| Univariate                            | 1.109 (0.938–1.310)         | 0.226 | Univariate                            | 1.023 (1.008–1.038) | 0.003 |
| Model 1                               | 1.128 (0.948–1.342)         | 0.176 | Model 1                               | 1.023 (1.008–1.039) | 0.003 |

|                           |                     |       |                          |                     |       |
|---------------------------|---------------------|-------|--------------------------|---------------------|-------|
| Model 2                   | 1.117 (0.924–1.350) | 0.253 | Model 2                  | 1.026 (1.010–1.043) | 0.002 |
| Model 3                   | 1.112 (0.905–1.366) | 0.312 | Model 3                  | 1.026 (1.009–1.043) | 0.002 |
| HyperCompo (day 3–day 12) |                     |       | HypoCompo (day 3–day 12) |                     |       |
| Univariate                | 1.029 (1.005–1.053) | 0.016 | Univariate               | 1.035 (0.977–1.097) | 0.238 |
| Model 1                   | 1.028 (1.004–1.052) | 0.024 | Model 1                  | 1.043 (0.982–1.109) | 0.169 |
| Model 2                   | 1.033 (1.008–1.059) | 0.011 | Model 2                  | 1.038 (0.972–1.108) | 0.269 |
| Model 3                   | 1.033 (1.007–1.059) | 0.012 | Model 3                  | 1.038 (0.968–1.114) | 0.294 |
| HBGI (day 3–day 12)       |                     |       | LBGI (day 3–day 12)      |                     |       |
| Univariate                | 1.122 (1.025–1.227) | 0.012 | Univariate               | 1.104 (0.948–1.286) | 0.202 |
| Model 1                   | 1.118 (1.020–1.225) | 0.017 | Model 1                  | 1.118 (0.939–1.330) | 0.211 |
| Model 2                   | 1.137 (1.034–1.251) | 0.008 | Model 2                  | 1.111 (0.932–1.325) | 0.239 |
| Model 3                   | 1.135 (1.031–1.249) | 0.010 | Model 3                  | 1.114 (0.934–1.329) | 0.229 |

The results are the median values (interquartile range) or percentages. The Mann–Whitney U test was used to compare continuous variables, and the chi-square test or Fisher’s exact test was used to compare categorical data.

Abbreviations: CI, confidence interval; CV, coefficient of variation; GRI, glycemia risk index; HBGI, high blood glucose index; HyperCompo, hyperglycemia component; HypoCompo, hyperglycemia component; LBGI, low blood glucose index; OR, odds ratio; SG, sensor glucose; TAR, time above range; TBR, time below range; TIR, time in range.

Supplementary Table 4. Relationship between medial temporal atrophy and glycemic control index

|                                       | Z-scores in the target VOI |          |                                       |          |       |
|---------------------------------------|----------------------------|----------|---------------------------------------|----------|-------|
|                                       | $\beta$                    | <i>P</i> | $\beta$                               | <i>P</i> |       |
| Mean SG (day 3–day 12)                |                            |          | CV (day 3–day 12)                     |          |       |
| Univariate                            | 0.074                      | 0.370    | Univariate                            | -0.061   | 0.457 |
| Model 1                               | 0.042                      | 0.594    | Model 1                               | -0.062   | 0.428 |
| Model 2                               | 0.071                      | 0.371    | Model 2                               | -0.067   | 0.425 |
| TIR (day 3–day 12)                    |                            |          | TAR <sup>&gt;250</sup> (day 3–day 12) |          |       |
| Univariate                            | -0.032                     | 0.694    | Univariate                            | 0.134    | 0.104 |
| Model 1                               | -0.020                     | 0.797    | Model 1                               | 0.093    | 0.240 |
| Model 2                               | -0.053                     | 0.510    | Model 2                               | 0.115    | 0.146 |
| TAR <sup>&gt;180</sup> (day 3–day 12) |                            |          | TBR <sup>&lt;70</sup> (day 3–day 12)  |          |       |
| Univariate                            | 0.044                      | 0.589    | Univariate                            | -0.043   | 0.599 |
| Model 1                               | 0.023                      | 0.767    | Model 1                               | -0.013   | 0.870 |
| Model 2                               | 0.057                      | 0.474    | Model 2                               | -0.023   | 0.767 |
| TBR <sup>&lt;54</sup> (day 3–day 12)  |                            |          | GRI (day 3–day 12)                    |          |       |
| Univariate                            | 0.036                      | 0.664    | Univariate                            | 0.034    | 0.684 |
| Model 1                               | 0.057                      | 0.466    | Model 1                               | 0.030    | 0.699 |
| Model 2                               | 0.040                      | 0.610    | Model 2                               | 0.058    | 0.466 |
| HyperCompo (day 3–day 12)             |                            |          | HypoCompo (day 3–day 12)              |          |       |
| Univariate                            | 0.076                      | 0.358    | Univariate                            | -0.038   | 0.644 |
| Model 1                               | 0.047                      | 0.551    | Model 1                               | -0.008   | 0.920 |
| Model 2                               | 0.078                      | 0.325    | Model 2                               | -0.019   | 0.810 |



| HBGI (day 3–day 12) |       |       | LBGI (day 3–day 12) |       |       |
|---------------------|-------|-------|---------------------|-------|-------|
| Univariate          | 0.069 | 0.400 | Univariate          | 0.022 | 0.793 |
| Model 1             | 0.043 | 0.586 | Model 1             | 0.016 | 0.843 |
| Model 2             | 0.069 | 0.378 | Model 2             | 0.003 | 0.967 |

A simple linear regression analysis was performed with the Z-score in the volume of interest (VOI) as the objective variable and each glycemic control index as the explanatory variable. A multiple regression analysis was then performed on each glycemic control index plus age as explanatory variables in Model 1. Furthermore, in Model 2, a multiple regression analysis was performed by adding sex, body mass index, presence of hypertension and dyslipidemia, history of cerebrovascular disease, and smoking as explanatory variables to Model 1.

Abbreviations:  $\beta$ , standardized partial regression coefficient; CV, coefficient of variation; GRI, glycemia risk index; HBGI, high blood glucose index; HyperCompo, hyperglycemia component; HypoCompo, hypoglycemia component; LBGI, low blood glucose index; SG, sensor glucose; TAR, time above range; TBR, time below range; TIR, time in range.
